# Supplementary material for: Identification of hub genes and key pathways in the emphysema phenotype of COPD
Source: publisher site journal article supplement (doi:10.18632/aging.202432), 2021-02-01
Supplement: Supplementary file [file aging-v13i4-202432-supplementary-material-SD1.pdf]

SUPPLEMENTARY FIGURE

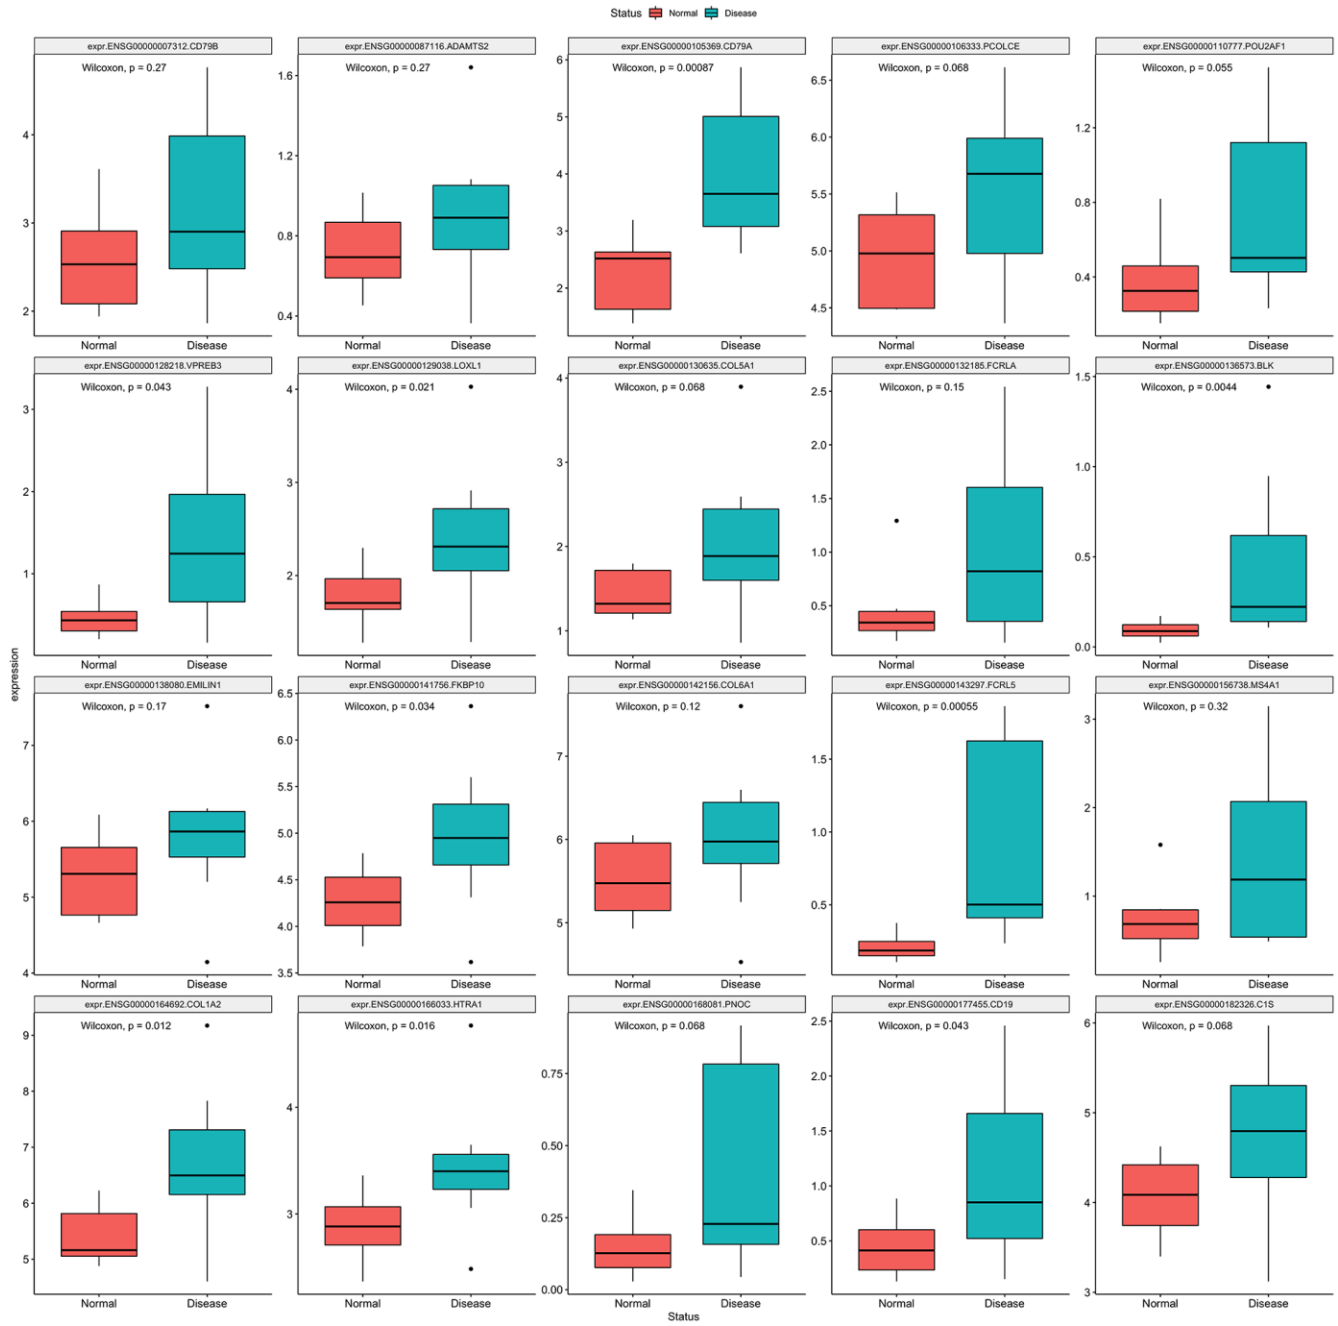

Supplementary Figure 1. Expression of top 10 hub genes in the yellow-green and brown modules.
